# Supplementary material for: How many individuals share a mitochondrial genome?
Source: PubMed Central journal article supplement (PMC6233927; doi:10.1371/journal.pgen.1007774), 2018-11-01
Supplement: pgen.1007774.s001.pdf [file pgen.1007774.s001.pdf]

| Quantile              | 50% | 95%   | 99%   |
|-----------------------|-----|-------|-------|
| Unconditional         | 149 | 675   | 1,085 |
| $n = 100 / m = 0$     | 138 | 624   | 989   |
| $n = 1,000 / m = 0$   | 86  | 380   | 585   |
| $n = 10,000 / m = 0$  | 18  | 79    | 121   |
| $n = 100 / m = 1$     | 351 | 1,030 | 1,469 |
| $n = 1,000 / m = 1$   | 211 | 605   | 859   |
| $n = 10,000 / m = 1$  | 44  | 124   | 173   |
| $n = 100 / m = 2$     | 568 | 1,360 | 1,573 |
| $n = 1,000 / m = 2$   | 343 | 816   | 1,103 |
| $n = 10,000 / m = 2$  | 71  | 165   | 221   |
| $n = 1,000 / m = 5$   | 745 | 1,418 | 1,573 |
| $n = 10,000 / m = 5$  | 148 | 275   | 345   |
| $n = 10,000 / m = 10$ | 280 | 450   | 533   |
