# Supplementary material for: How many individuals share a mitochondrial genome?
Source: PubMed Central journal article supplement (PMC6233927; doi:10.1371/journal.pgen.1007774), 2018-11-01
Supplement: pgen.1007774.s002.pdf [file pgen.1007774.s002.pdf]

| Quantile            | 50%   | 95%   | 99%    |
|---------------------|-------|-------|--------|
| Unconditional       | 295   | 2,869 | 5,603  |
| n = 100 / m = 0     | 268   | 2,524 | 4,655  |
| n = 1,000 / m = 0   | 161   | 1,134 | 2,126  |
| n = 10,000 / m = 0  | 46    | 231   | 375    |
| n = 100 / m = 1     | 1,548 | 6,042 | 9,108  |
| n = 1,000 / m = 1   | 661   | 2,556 | 3,665  |
| n = 10,000 / m = 1  | 130   | 406   | 588    |
| n = 100 / m = 2     | 3,246 | 9,108 | 10,561 |
| n = 1,000 / m = 2   | 1,372 | 3,683 | 5,340  |
| n = 10,000 / m = 2  | 223   | 569   | 782    |
| n = 1,000 / m = 5   | 3,567 | 7,168 | 9,177  |
| n = 10,000 / m = 5  | 534   | 1,038 | 1,302  |
| n = 10,000 / m = 10 | 1,084 | 1,762 | 2,140  |
