# Supplementary material for: How many individuals share a mitochondrial genome?
Source: PubMed Central journal article supplement (PMC6233927; doi:10.1371/journal.pgen.1007774), 2018-11-01
Supplement: pgen.1007774.s003.pdf [file pgen.1007774.s003.pdf]

| Quantile            | 50%   | 95%   | 99%   |
|---------------------|-------|-------|-------|
| Unconditional       | 177   | 761   | 1,148 |
| n = 100 / m = 0     | 174   | 744   | 1,114 |
| n = 1,000 / m = 0   | 146   | 627   | 956   |
| n = 10,000 / m = 0  | 56    | 244   | 375   |
| n = 100 / m = 1     | 416   | 1,154 | 1,627 |
| n = 1,000 / m = 1   | 352   | 981   | 1,364 |
| n = 10,000 / m = 1  | 137   | 386   | 543   |
| n = 100 / m = 2     | 658   | 1,528 | 2,136 |
| n = 1,000 / m = 2   | 558   | 1,297 | 1,725 |
| n = 10,000 / m = 2  | 219   | 514   | 686   |
| n = 1,000 / m = 5   | 1,154 | 2,151 | 2,293 |
| n = 10,000 / m = 5  | 463   | 856   | 1,061 |
| n = 10,000 / m = 10 | 862   | 1,364 | 1,639 |
