# Supplementary material for: How many individuals share a mitochondrial genome?
Source: PubMed Central journal article supplement (PMC6233927; doi:10.1371/journal.pgen.1007774), 2018-11-01
Supplement: pgen.1007774.s004.pdf [file pgen.1007774.s004.pdf]

| Quantile              | 50% | 95%   | 99%   |
|-----------------------|-----|-------|-------|
| Unconditional         | 193 | 859   | 1,293 |
| $n = 100 / m = 0$     | 176 | 784   | 1,190 |
| $n = 1,000 / m = 0$   | 99  | 432   | 676   |
| $n = 10,000 / m = 0$  | 18  | 81    | 124   |
| $n = 100 / m = 1$     | 440 | 1,222 | 1,605 |
| $n = 1,000 / m = 1$   | 242 | 702   | 982   |
| $n = 10,000 / m = 1$  | 45  | 128   | 179   |
| $n = 100 / m = 2$     | 704 | 1,517 | 1,827 |
| $n = 1,000 / m = 2$   | 391 | 932   | 1,228 |
| $n = 10,000 / m = 2$  | 73  | 169   | 226   |
| $n = 1,000 / m = 5$   | 836 | 1,507 | 1,818 |
| $n = 10,000 / m = 5$  | 151 | 285   | 355   |
| $n = 10,000 / m = 10$ | 290 | 458   | 545   |
