# Supplementary material for: How many individuals share a mitochondrial genome?
Source: PubMed Central journal article supplement (PMC6233927; doi:10.1371/journal.pgen.1007774), 2018-11-01
Supplement: pgen.1007774.s005.pdf [file pgen.1007774.s005.pdf]

| Quantile            | 50%   | 95%    | 99%    |
|---------------------|-------|--------|--------|
| Unconditional       | 387   | 3,835  | 7,361  |
| n = 100 / m = 0     | 339   | 3,242  | 5,662  |
| n = 1,000 / m = 0   | 182   | 1,291  | 2,342  |
| n = 10,000 / m = 0  | 47    | 237    | 386    |
| n = 100 / m = 1     | 2,004 | 7,697  | 11,463 |
| n = 1,000 / m = 1   | 756   | 2,875  | 4,164  |
| n = 10,000 / m = 1  | 133   | 415    | 608    |
| n = 100 / m = 2     | 4,027 | 11,275 | 14,221 |
| n = 1,000 / m = 2   | 1,544 | 4,133  | 5,579  |
| n = 10,000 / m = 2  | 228   | 586    | 806    |
| n = 1,000 / m = 5   | 3,926 | 7,799  | 9,608  |
| n = 10,000 / m = 5  | 552   | 1,057  | 1,332  |
| n = 10,000 / m = 10 | 1,095 | 1,779  | 2,134  |
