# Supplementary material for: How many individuals share a mitochondrial genome?
Source: PubMed Central journal article supplement (PMC6233927; doi:10.1371/journal.pgen.1007774), 2018-11-01
Supplement: pgen.1007774.s006.pdf [file pgen.1007774.s006.pdf]

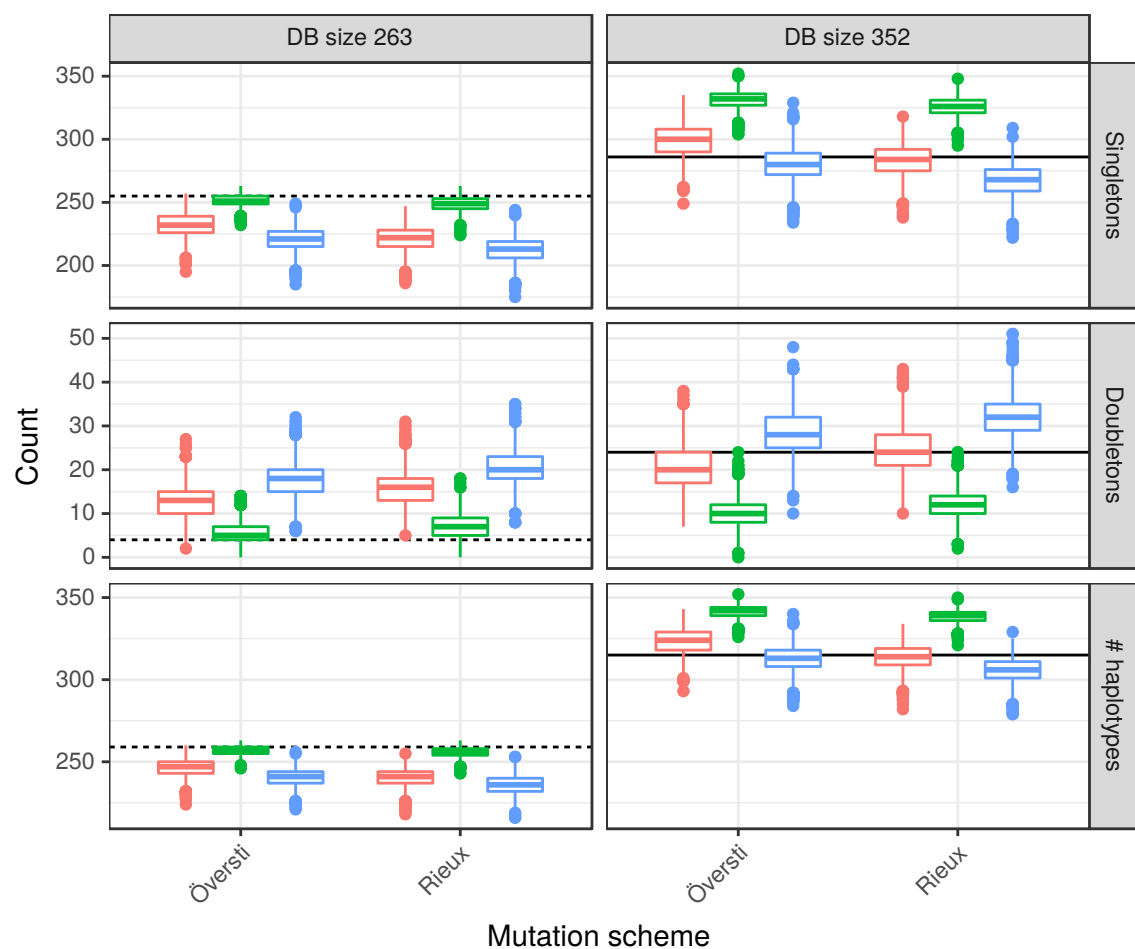

**Source**

— Derenko et al. (2013)

---- Just et al. (2015)

**Population size**

1.2M growth

300K const.

1.2M const.
